# Supplementary material for: Rational Design for Multicolor Flavone-Based Fluorophores with Aggregation-Induced Emission Enhancement Characteristics and Applications in Mitochondria-Imaging
Source: PubMed Central journal article supplement (PMC6225312; doi:10.3390/molecules23092290), 2018-09-07
Supplement: molecules-23-02290-s001.pdf [file molecules-23-02290-s001.pdf]

## Supplementary Information

### **Rational design for multicolor flavone-based fluorophores with Aggregation-induced emission enhancement characteristics and application for mitochondria-imaging**

**Liyan Liu<sup>1</sup>, Yaohui Lei<sup>1</sup>, Jianhui Zhang<sup>2</sup>, Na Li<sup>1</sup>, FanZhang<sup>1</sup>, Huaqiao Wang<sup>3</sup> and Feng He<sup>1,\*</sup>**

<sup>1</sup>School of Pharmaceutical Science, Sun Yat-sen University, Guangzhou 510006, China.

<sup>2</sup> School of Chemistry, Sun Yat-sen University, Guangzhou 510275, China.

<sup>3</sup> Department of Anatomy and Neurobiology, Zhongshan School of Medicine, Sun Yat-sen University, Guangzhou 510080, China.

\* Correspondence: hefeng@mail.sysu.edu.cn; Tel.: +86-203-994-3036

## Table of Contents

|                                                                                                                                                                      |            |
|----------------------------------------------------------------------------------------------------------------------------------------------------------------------|------------|
| PL spectra of <b>5g</b> , <b>5h</b> , <b>5i</b> , <b>5j</b> in CH <sub>3</sub> OH/H <sub>2</sub> O mixtures .....                                                    | Figure S1  |
| PL spectra of <b>5a</b> , <b>5b</b> , <b>5c</b> , <b>5d</b> , <b>5e</b> , <b>5f</b> in CH <sub>3</sub> OH/ethylene glycol mixtures .....                             | Figure S2  |
| Time-dependent fluorescence spectra of <b>5a</b> , <b>5b</b> , <b>5c</b> , <b>5d</b> , <b>5e</b> and <b>5f</b> in CH <sub>3</sub> OH/H <sub>2</sub> O mixtures ..... | Figure S3  |
| Pearson's correlation coefficient of <b>5a</b> , <b>5b</b> , <b>5c</b> , <b>5d</b> , <b>5e</b> , <b>5f</b> in A549 cells.....                                        | Figure S4  |
| <sup>1</sup> H, <sup>13</sup> C NMR spectra and ESI-MS analysis for compound <b>5a</b> .....                                                                         | Figure S5  |
| <sup>1</sup> H, <sup>13</sup> C NMR spectra and ESI-MS analysis for compound <b>5b</b> .....                                                                         | Figure S6  |
| <sup>1</sup> H, <sup>13</sup> C NMR spectra and ESI-MS analysis for compound <b>5c</b> .....                                                                         | Figure S7  |
| <sup>1</sup> H, <sup>13</sup> C NMR spectra and ESI-MS analysis for compound <b>5d</b> .....                                                                         | Figure S8  |
| <sup>1</sup> H, <sup>13</sup> C NMR spectra and ESI-MS analysis for compound <b>5e</b> .....                                                                         | Figure S9  |
| <sup>1</sup> H, <sup>13</sup> C NMR spectra and ESI-MS analysis for compound <b>5f</b> .....                                                                         | Figure S10 |
| <sup>1</sup> H, <sup>13</sup> C NMR spectra and ESI-MS analysis for compound <b>5g</b> .....                                                                         | Figure S11 |
| <sup>1</sup> H, <sup>13</sup> C NMR spectra and ESI-MS analysis for compound <b>5h</b> .....                                                                         | Figure S12 |
| <sup>1</sup> H, <sup>13</sup> C NMR spectra and ESI-MS analysis for compound <b>5i</b> .....                                                                         | Figure S13 |
| <sup>1</sup> H, <sup>13</sup> C NMR spectra and ESI-MS analysis for compound <b>5j</b> .....                                                                         | Figure S14 |

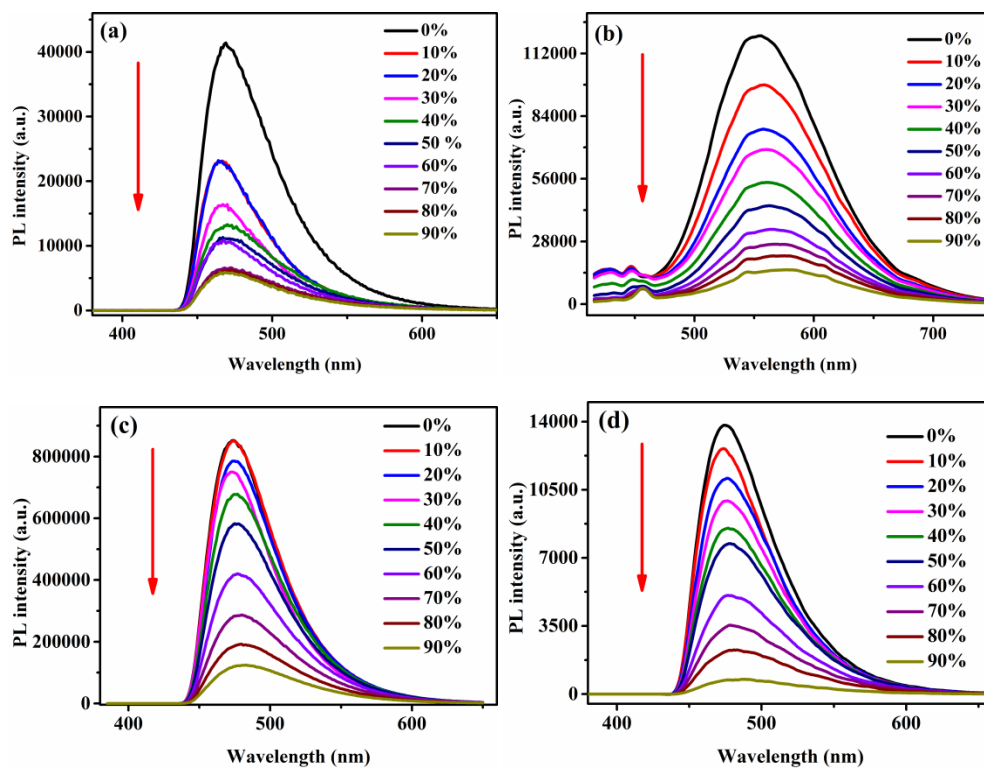

**Figure S1.** PL spectra of (a) **5g**, (b) **5h**, (c) **5i**, (d) **5j** ( $c = 2.09 \times 10^{-5}$  M) in  $\text{CH}_3\text{OH}/\text{H}_2\text{O}$  mixtures with different water fractions (0-90 vol%).

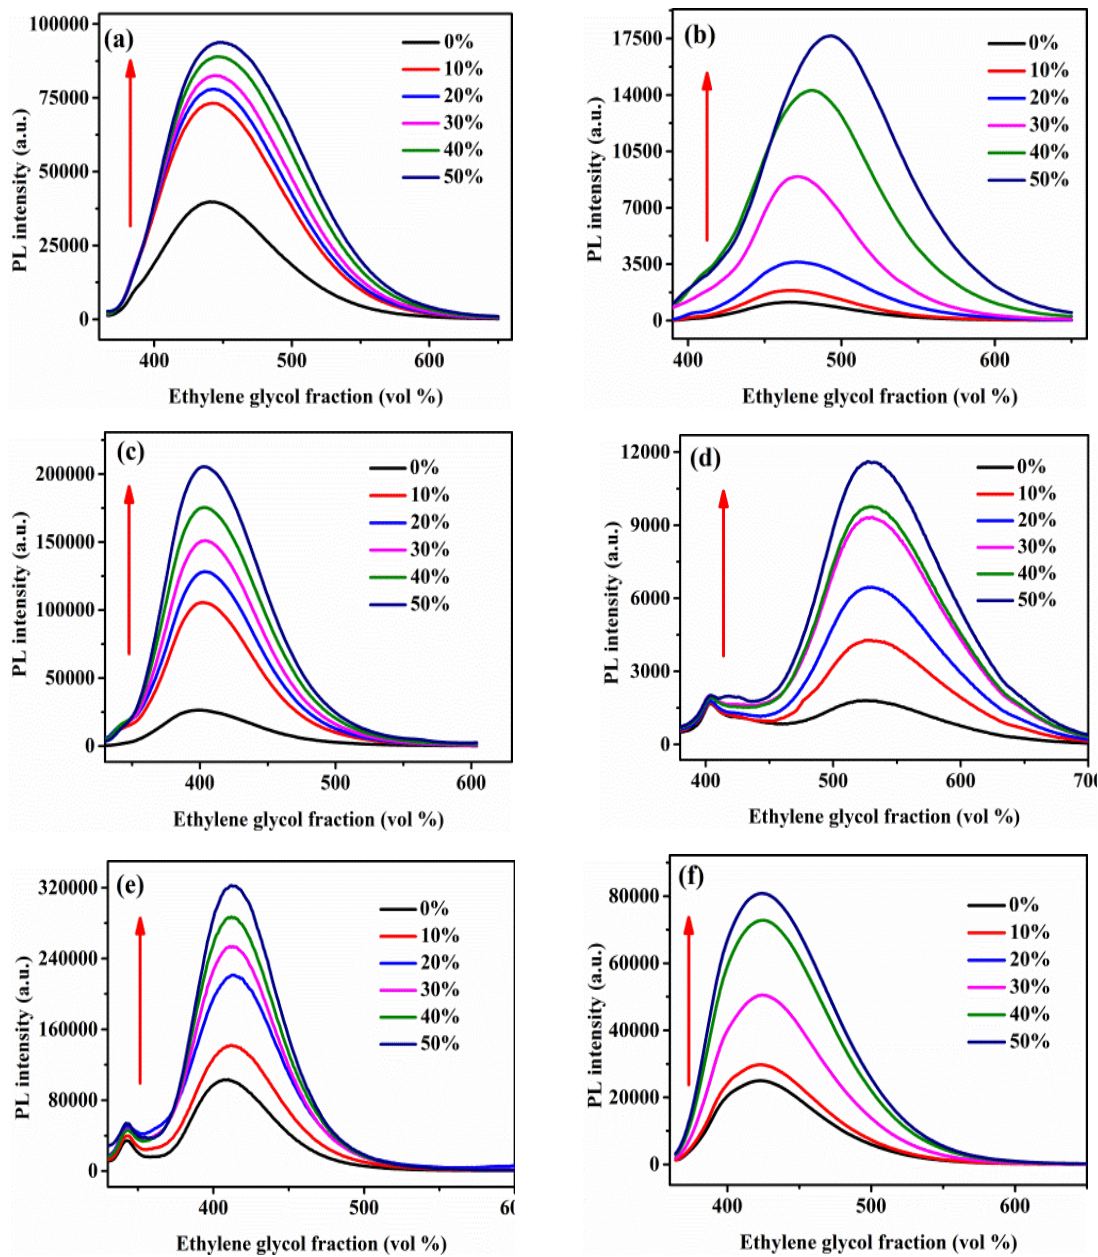

**Figure S2.** PL spectra of (a) 5a, (b) 5b, (c) 5c, (d) 5d, (e) 5e, (f) 5f. ( $c = 2.09 \times 10^{-5}$  M) in CH<sub>3</sub>OH/ ethylene glycol mixtures with different ethylene glycol fractions (0-50 vol%).

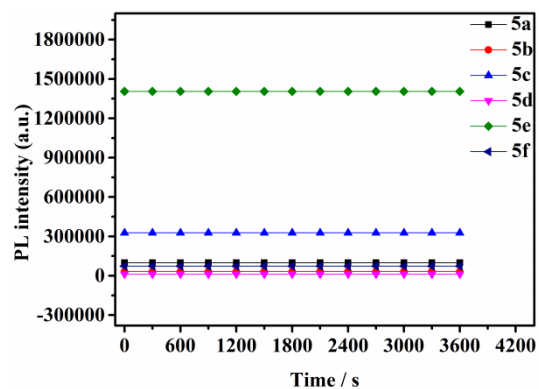

**Figure S3.** Time-dependent fluorescence spectra of **5a** (3: 7 v: v), **5b** (1: 9 v: v), **5c** (1: 9 v: v) , **5d** (5: 5 v: v), **5e** (1: 9 v: v) and **5f** (4: 6 v: v) in CH<sub>3</sub>OH/H<sub>2</sub>O ( v: v) mixtures ( $c = 2.09 \times 10^{-5}$  M).

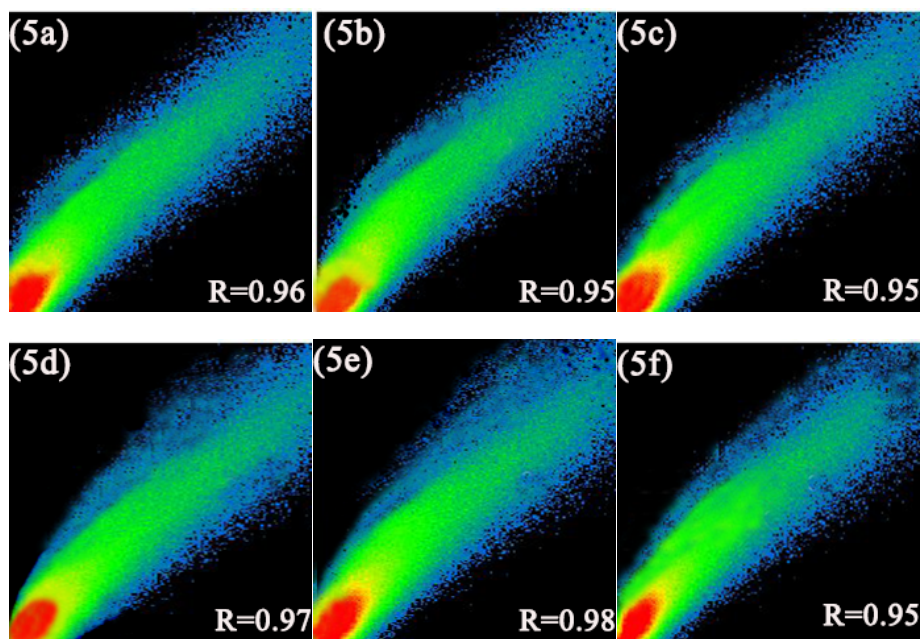

**Figure S4.** Pearson's correlation coefficient of **5a**, **5b**, **5c**, **5d**, **5e**, **5f** in A549 cells.

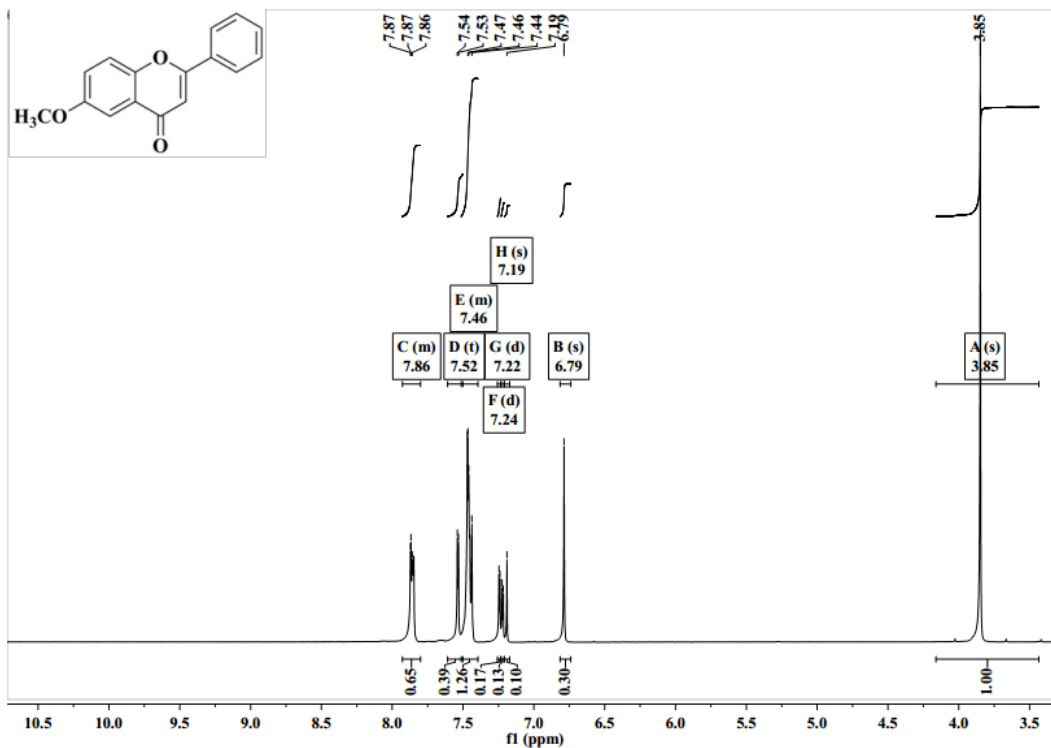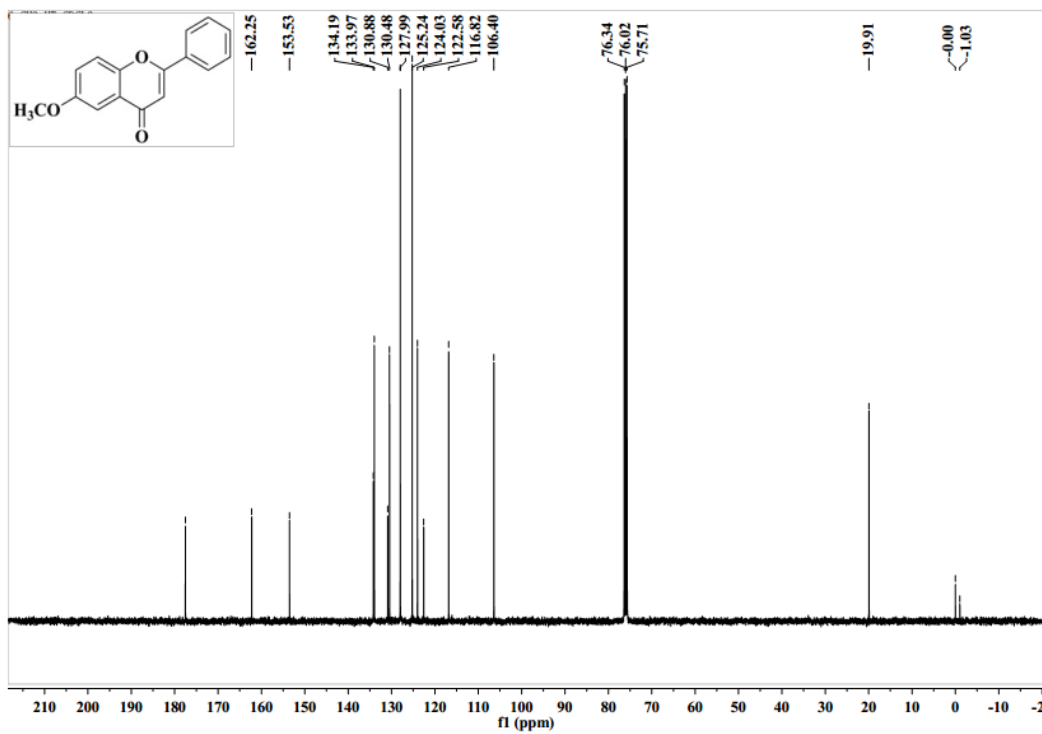

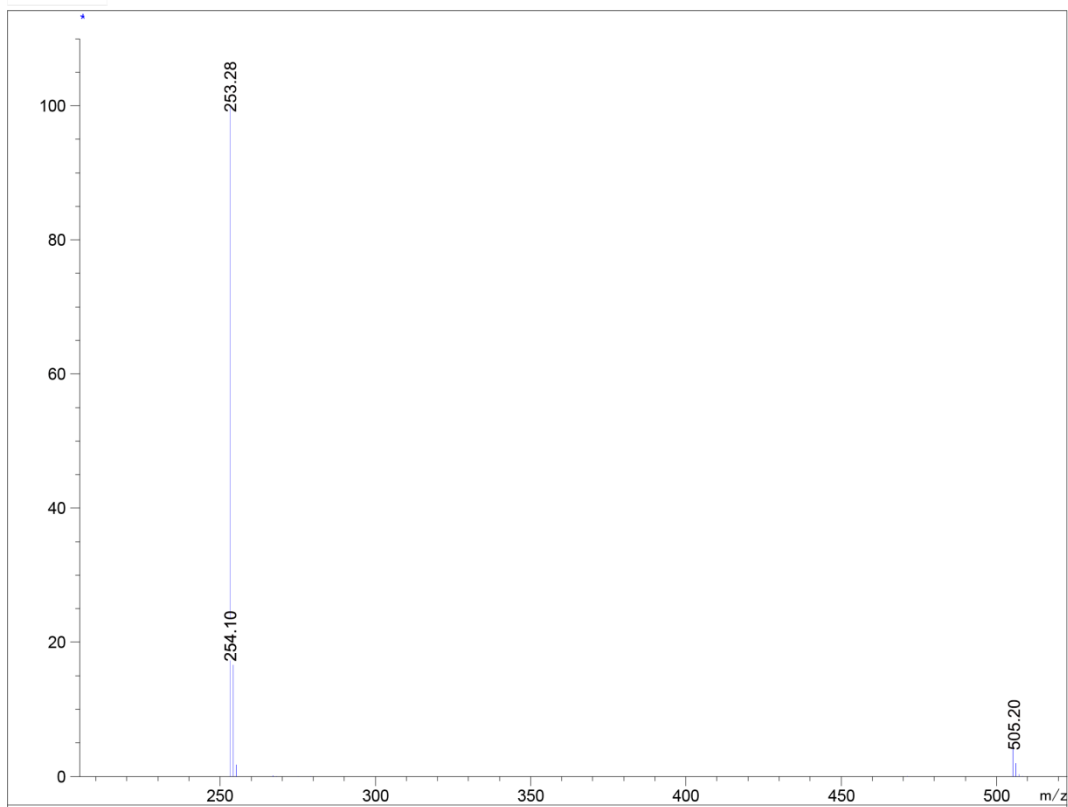

**Figure S5.**  $^1\text{H}$ ,  $^{13}\text{C}$  NMR spectra and ESI-MS analysis for compound **5a**.

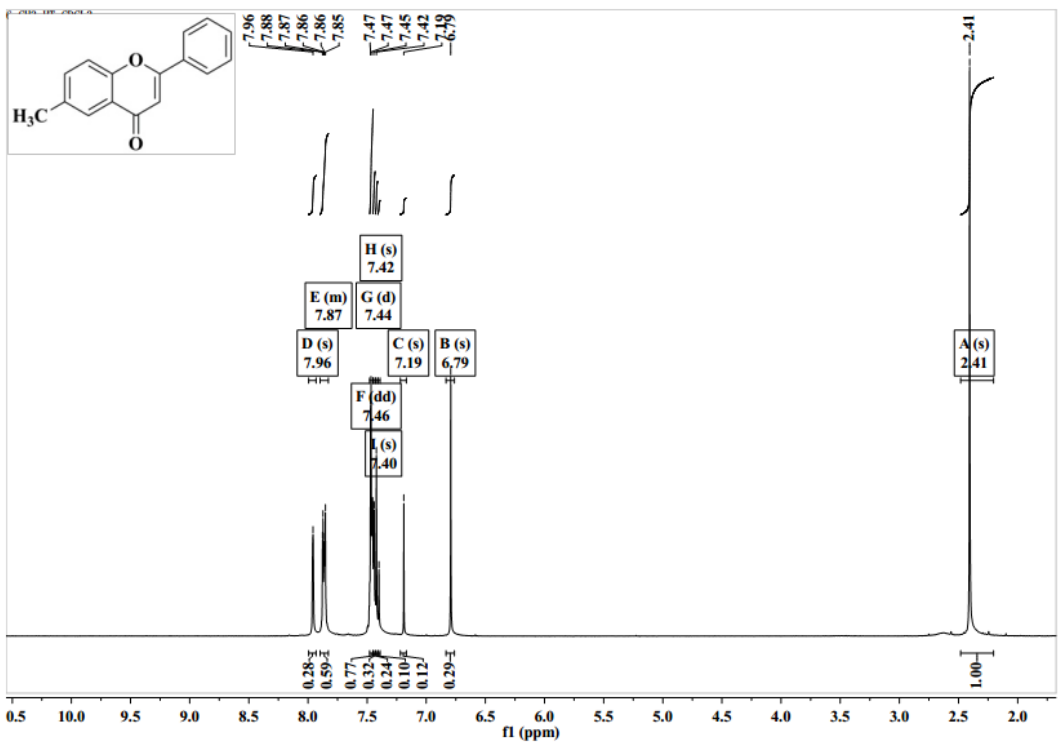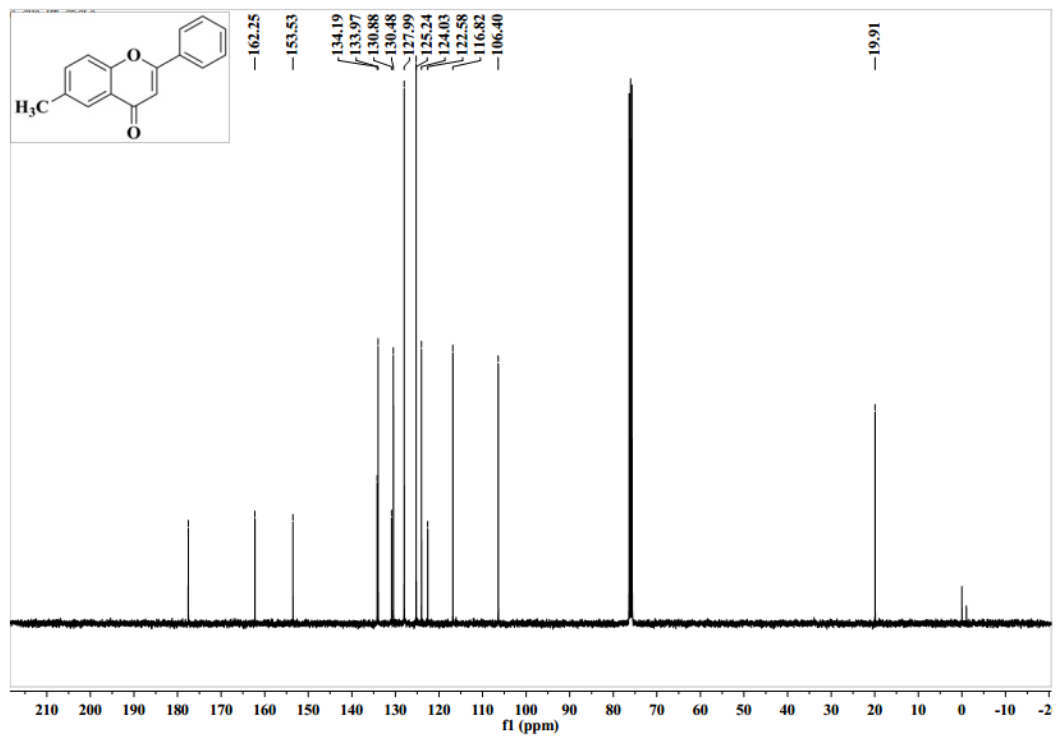



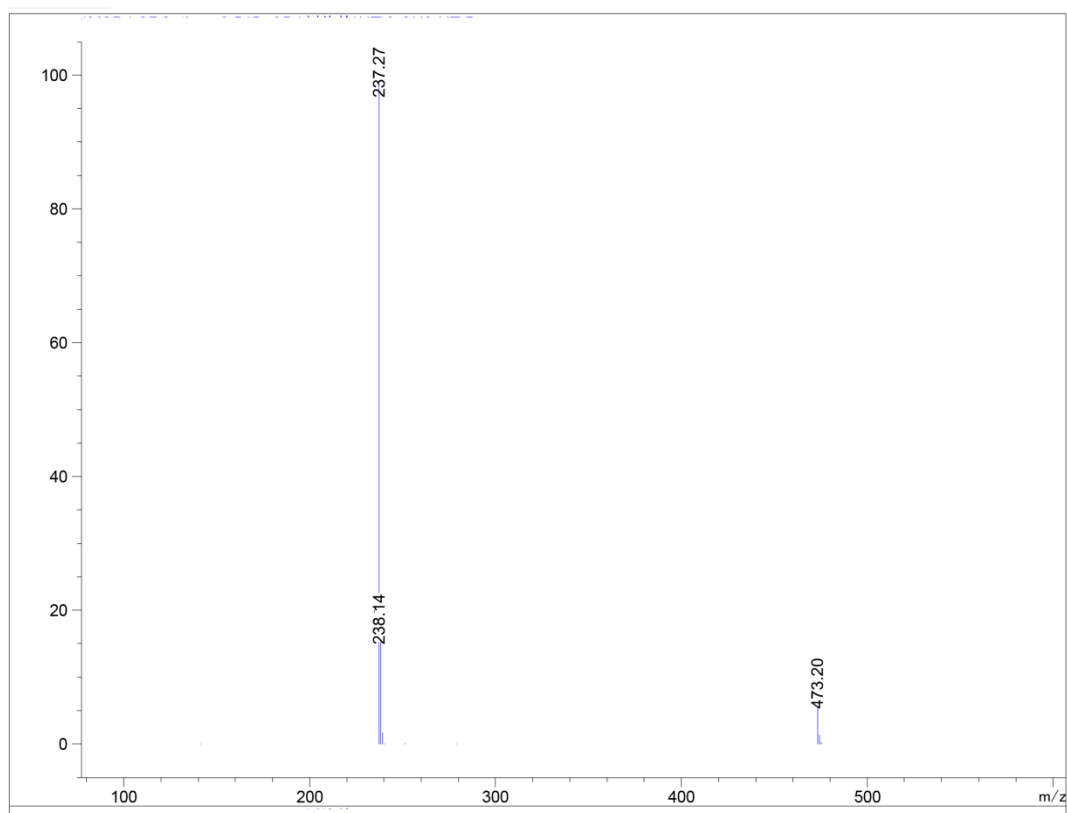

**Figure S6.**  $^1\text{H}$ ,  $^{13}\text{C}$  NMR spectra and ESI-MS analysis for compound **5b**.

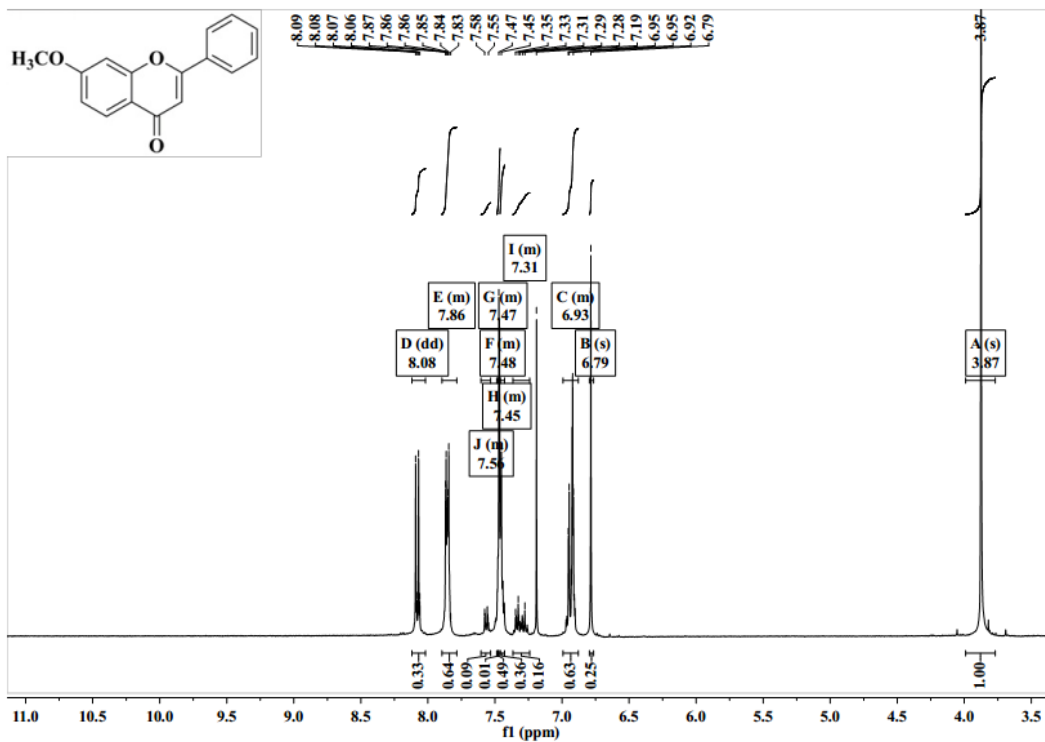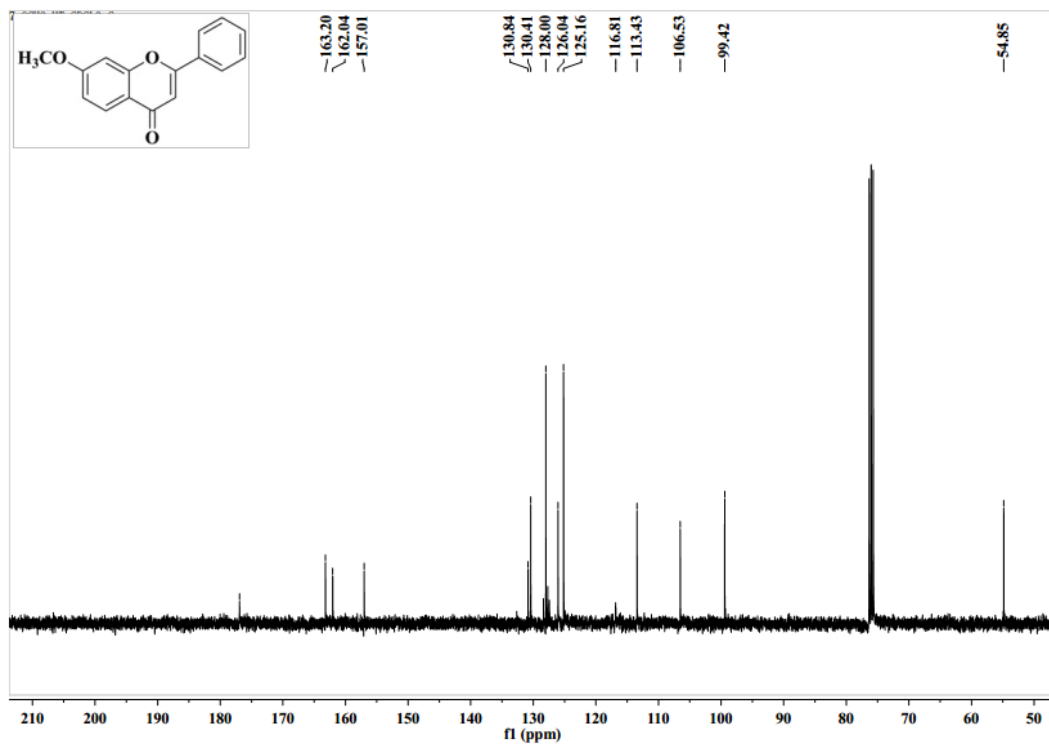

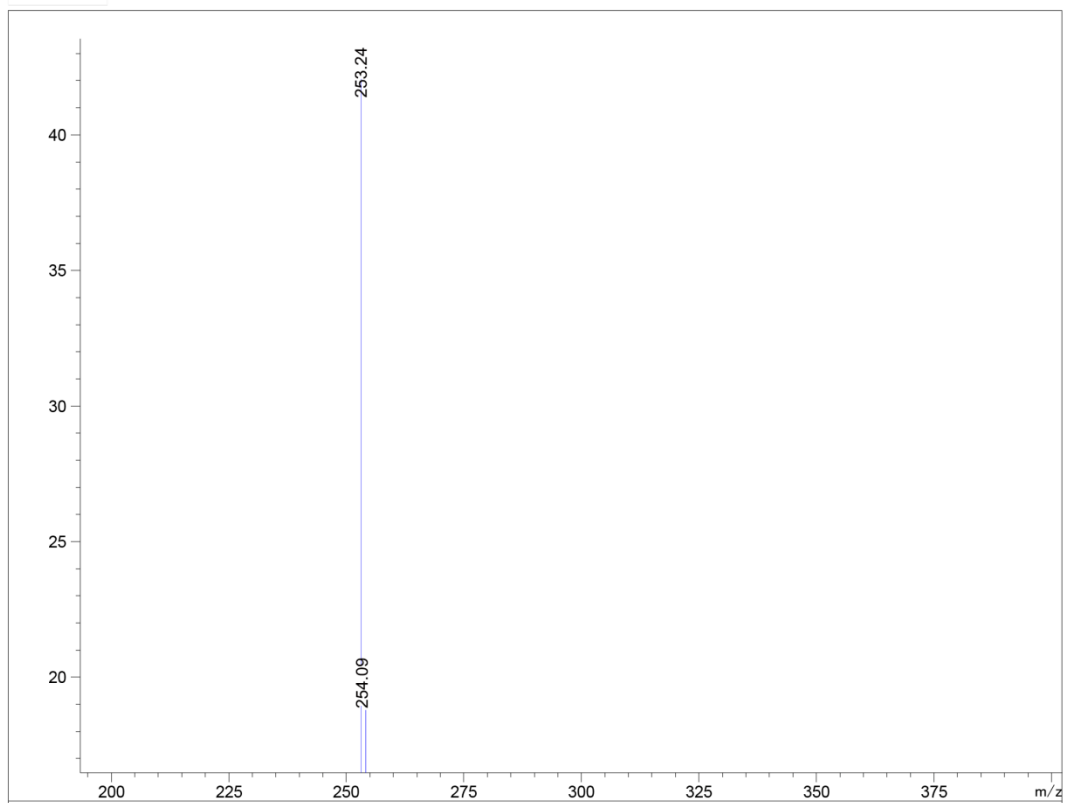

**Figure S7.**  $^1\text{H}$ ,  $^{13}\text{C}$  NMR spectra and ESI-MS analysis for compound **5c**.

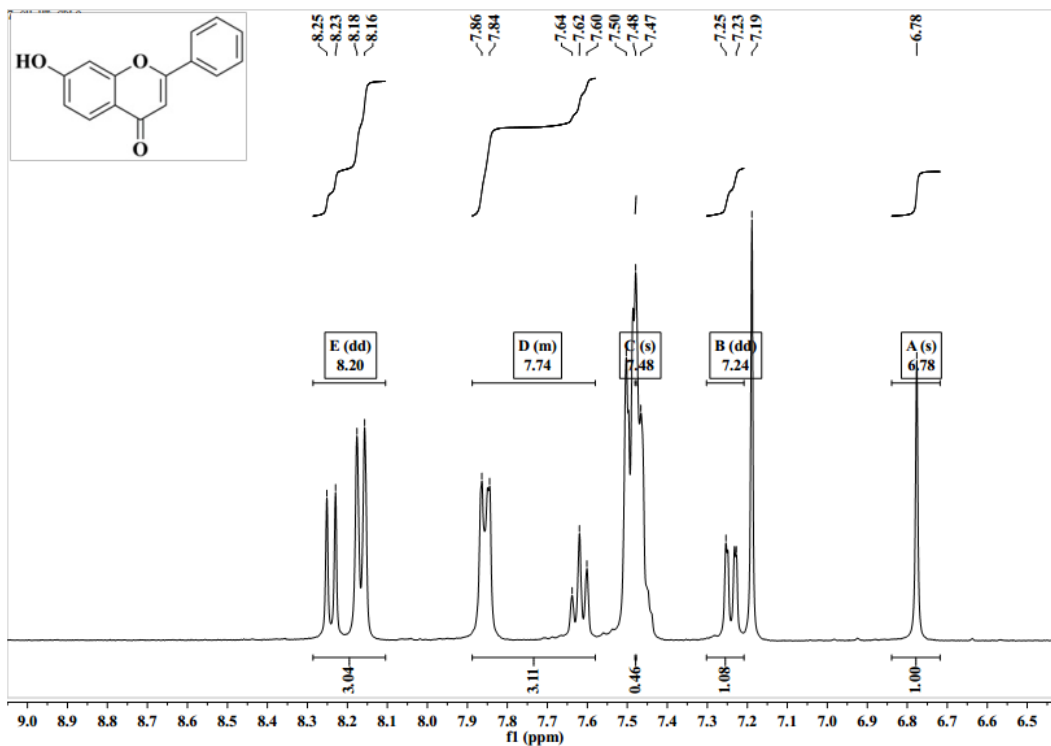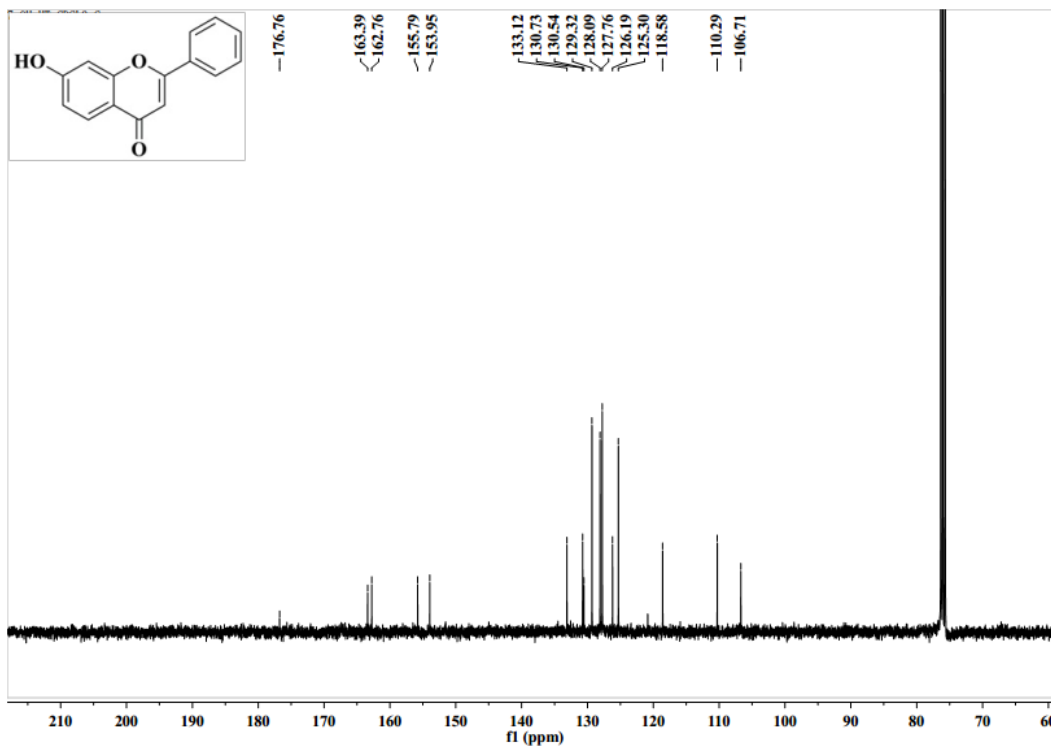

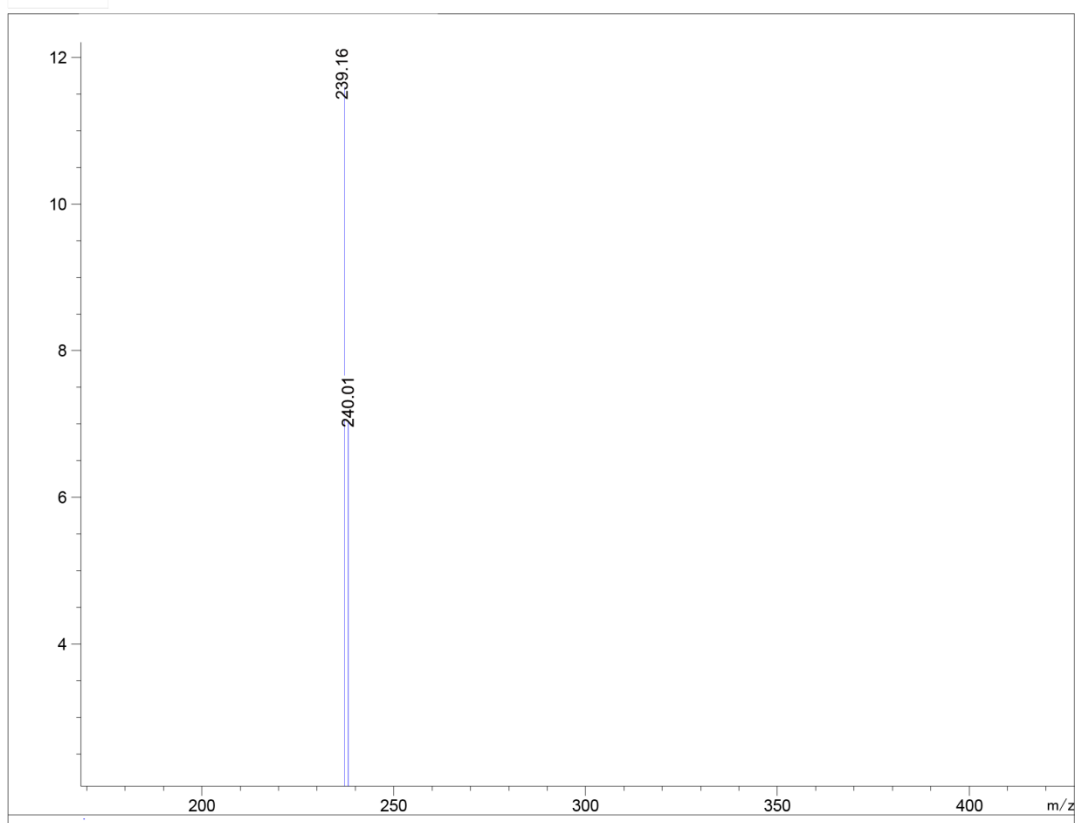

**Figure S8.**  $^1\text{H}$ ,  $^{13}\text{C}$  NMR spectra and ESI-MS analysis for compound **5d**.

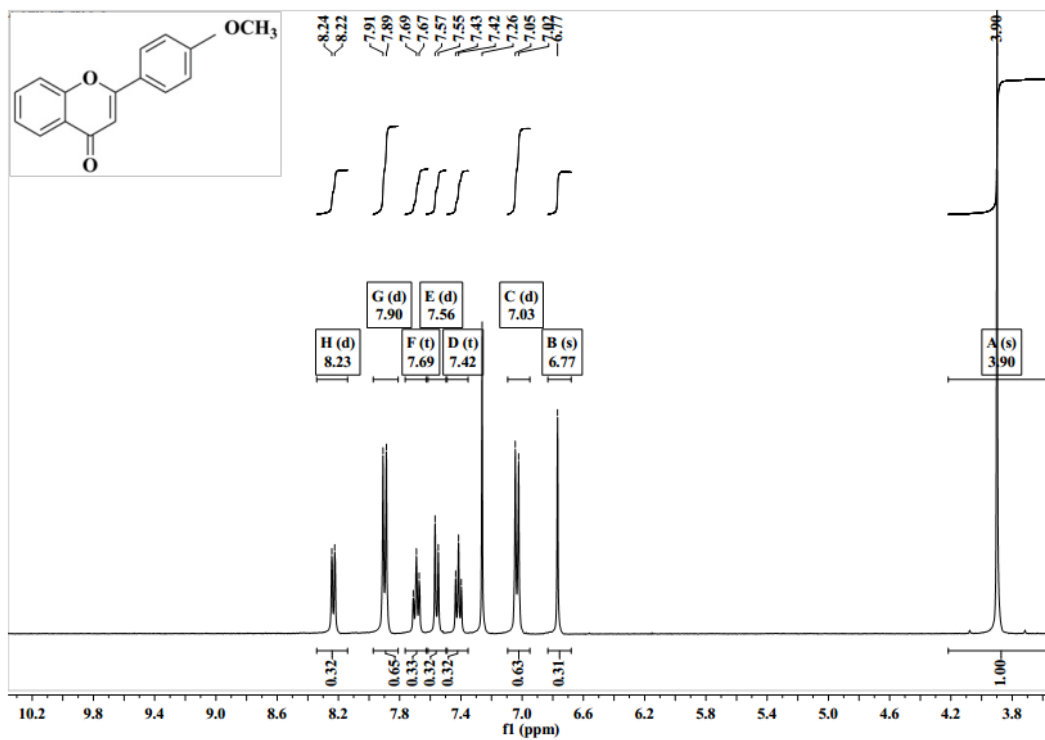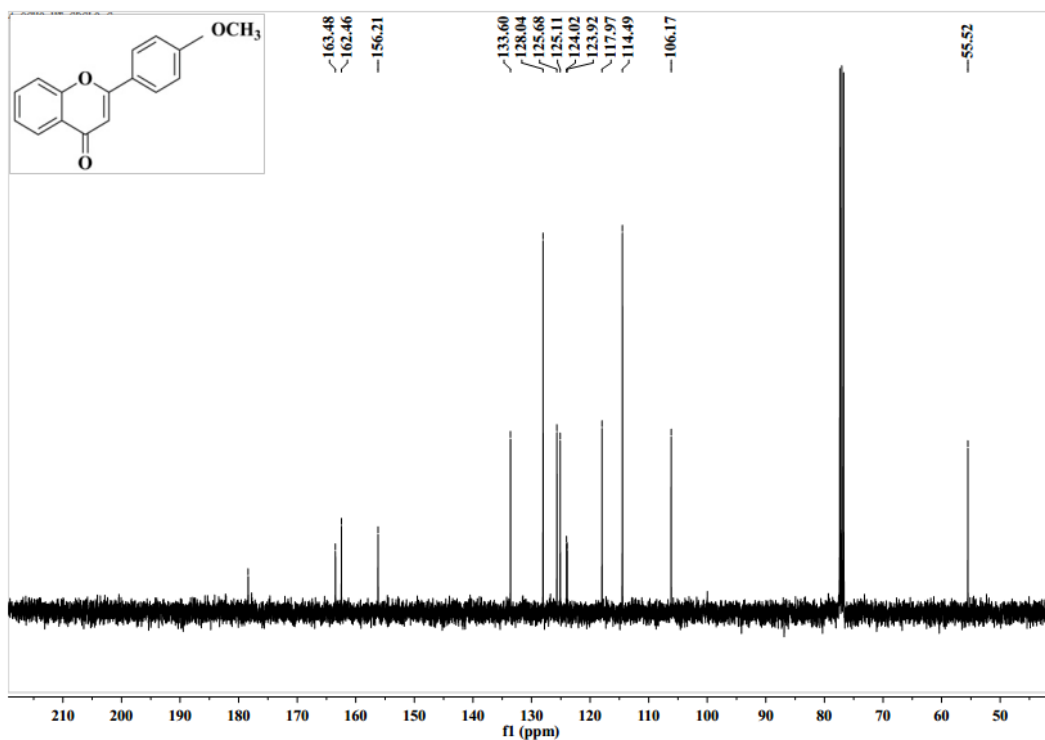

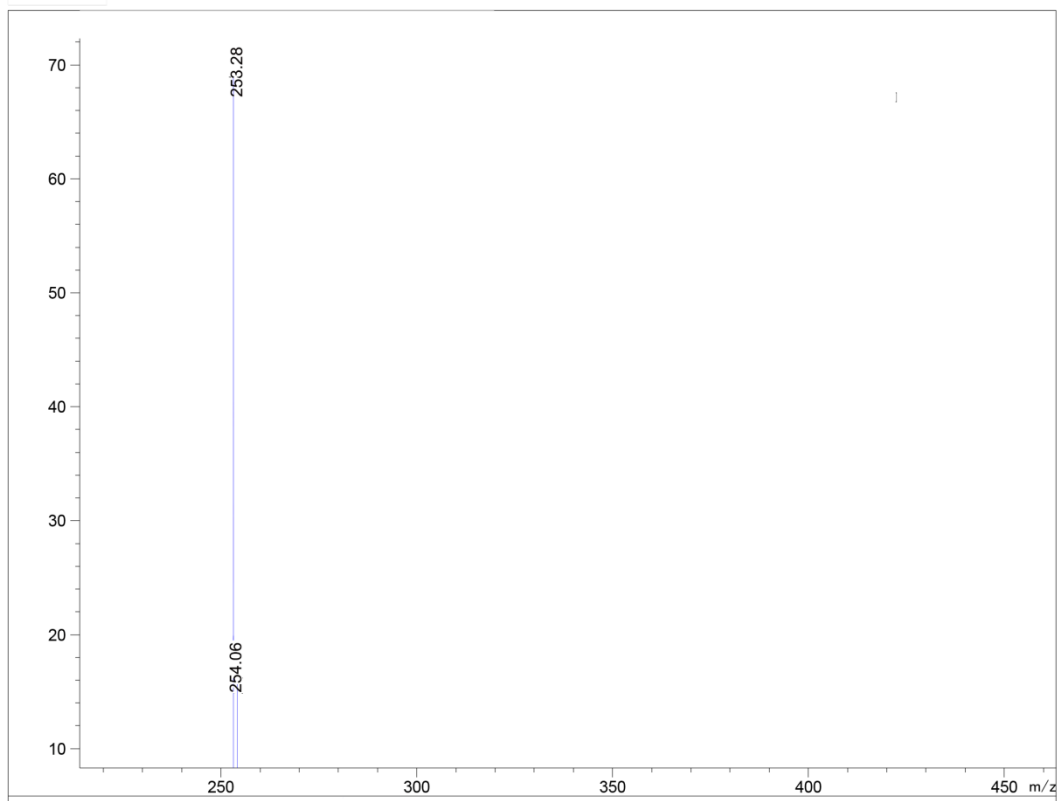

**Figure S9.**  $^1\text{H}$ ,  $^{13}\text{C}$  NMR spectra and ESI-MS analysis for compound **5e**.

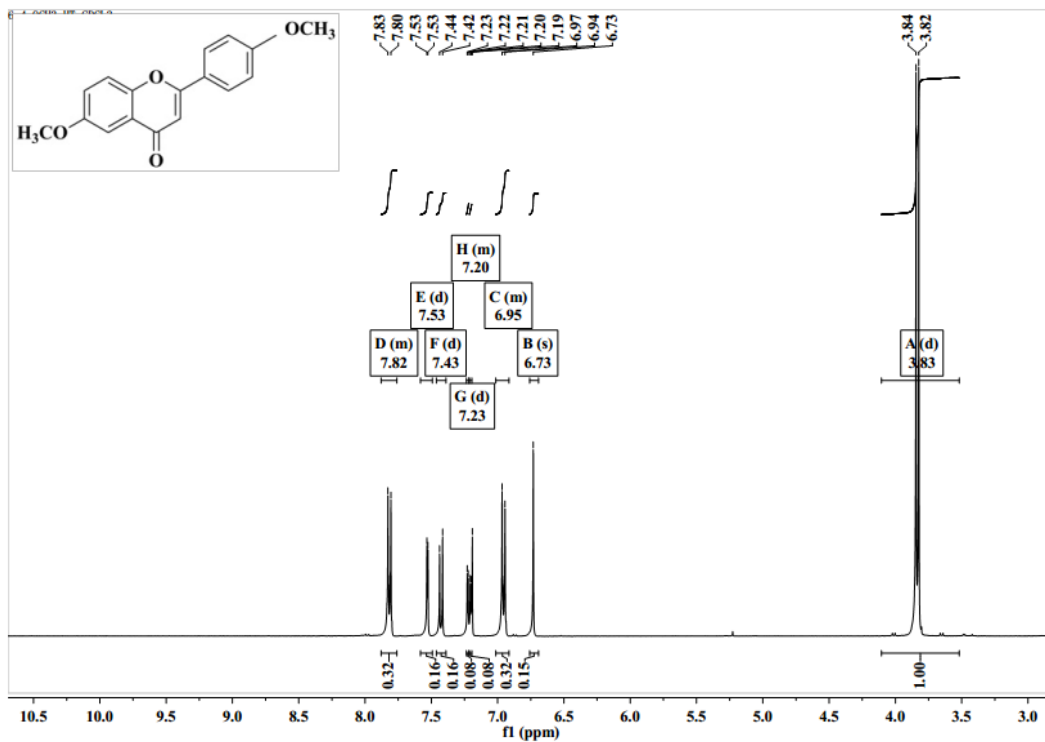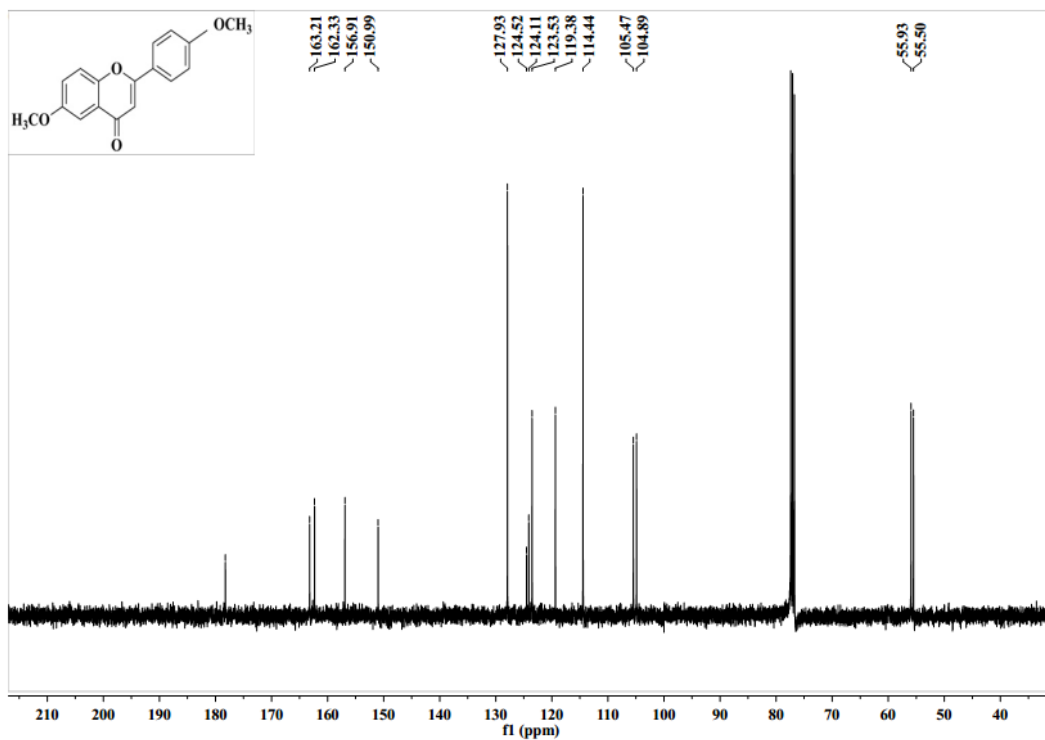



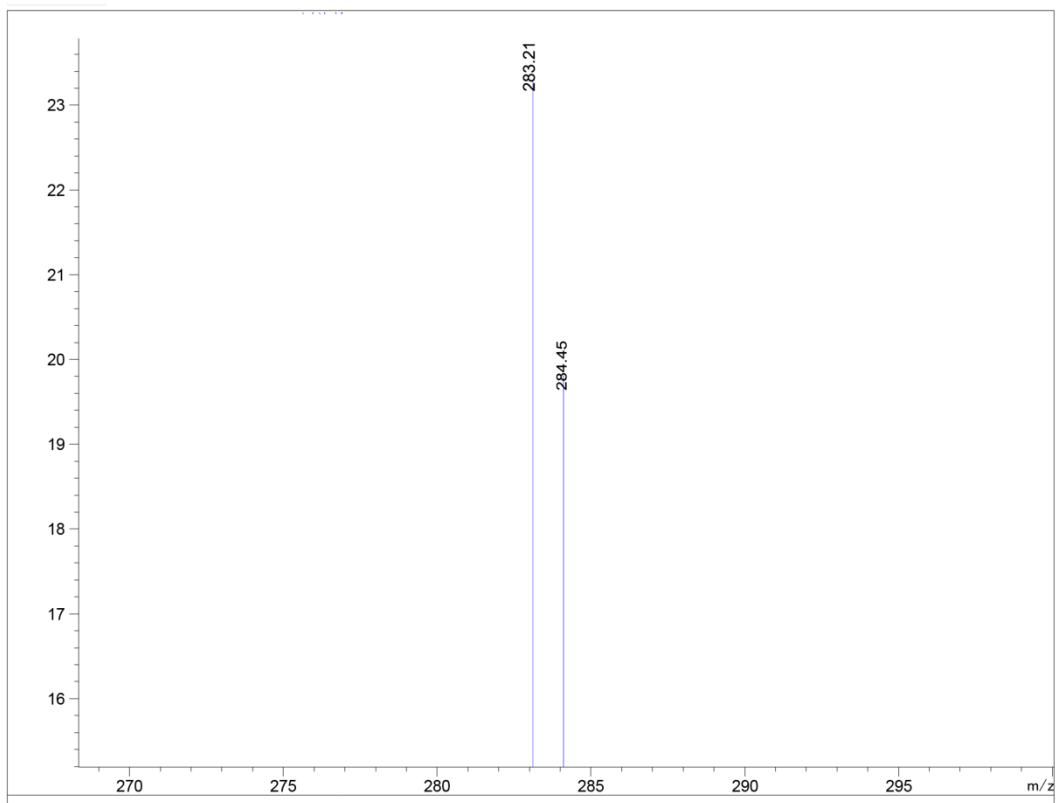

**Figure S10.**  $^1\text{H}$ ,  $^{13}\text{C}$  NMR spectra and ESI-MS analysis for compound **5f**.

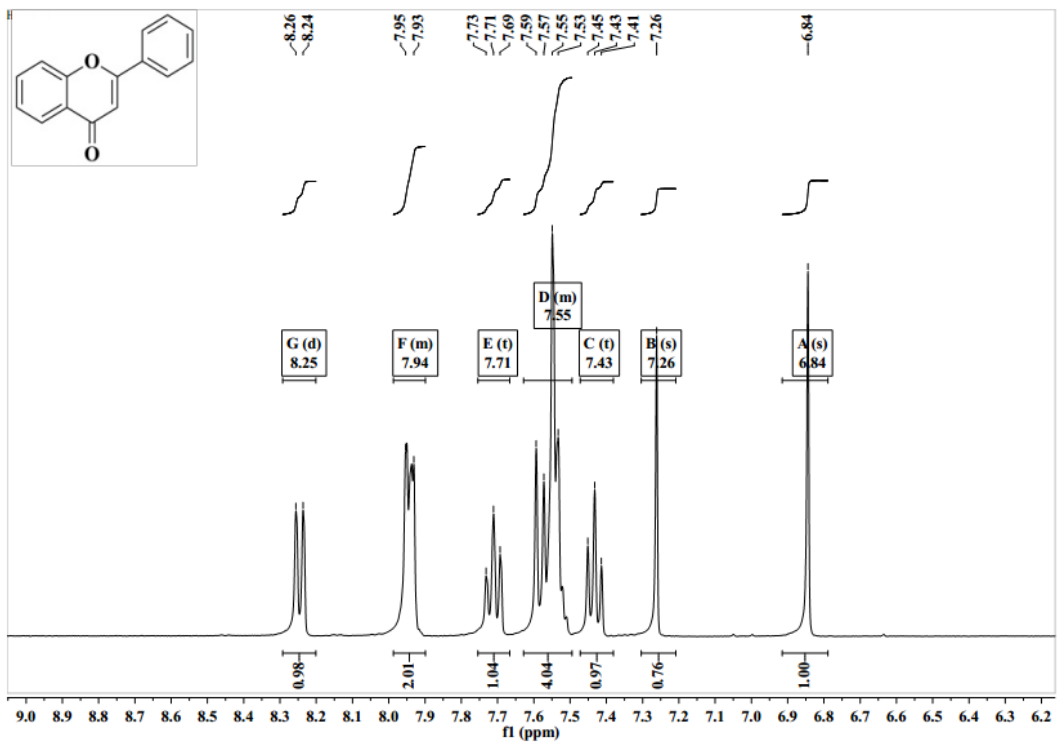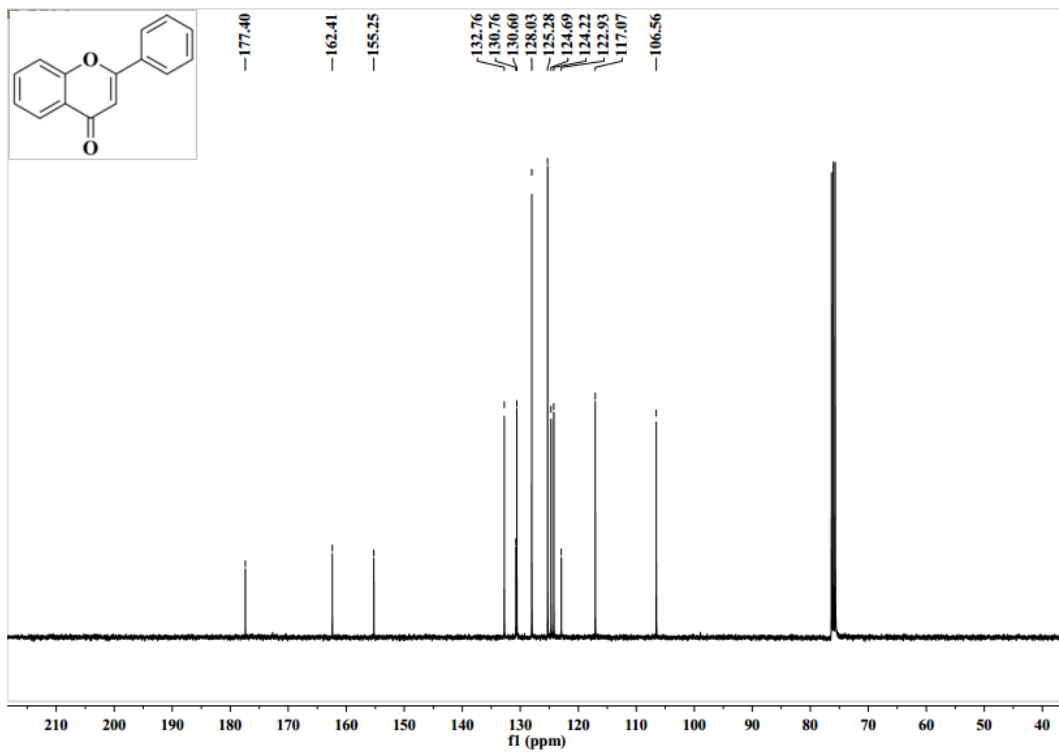

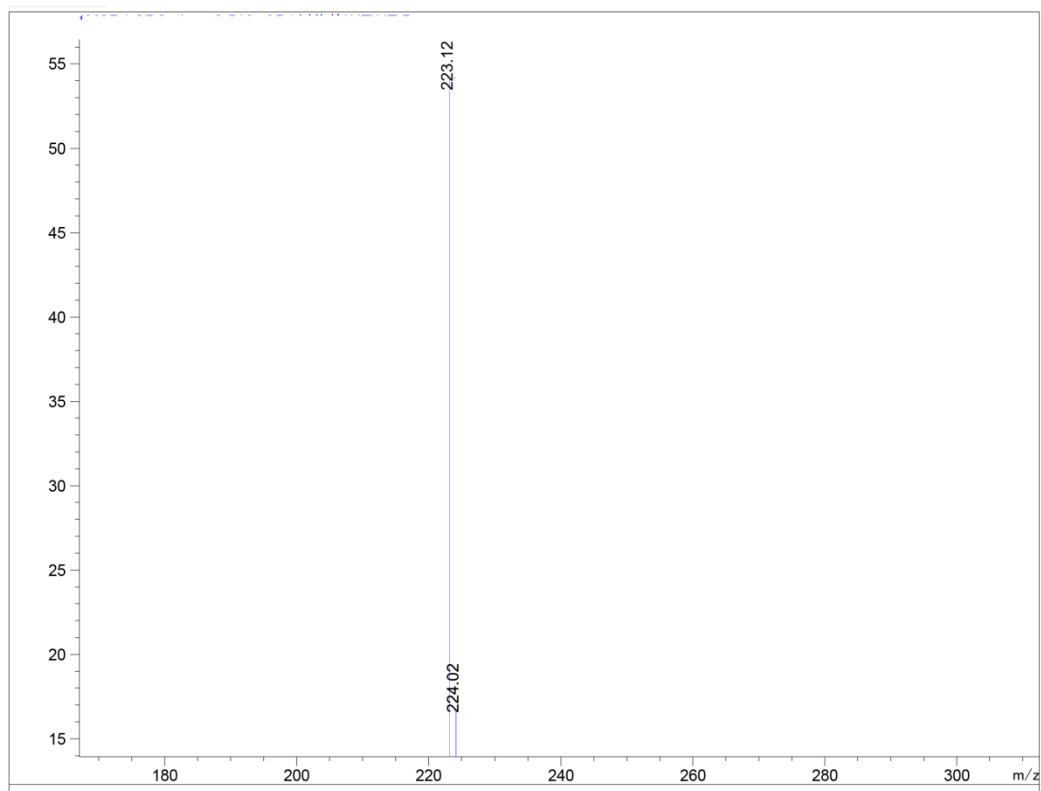

**Figure S11.**  $^1\text{H}$ ,  $^{13}\text{C}$  NMR spectra and ESI-MS analysis for compound **5g**.

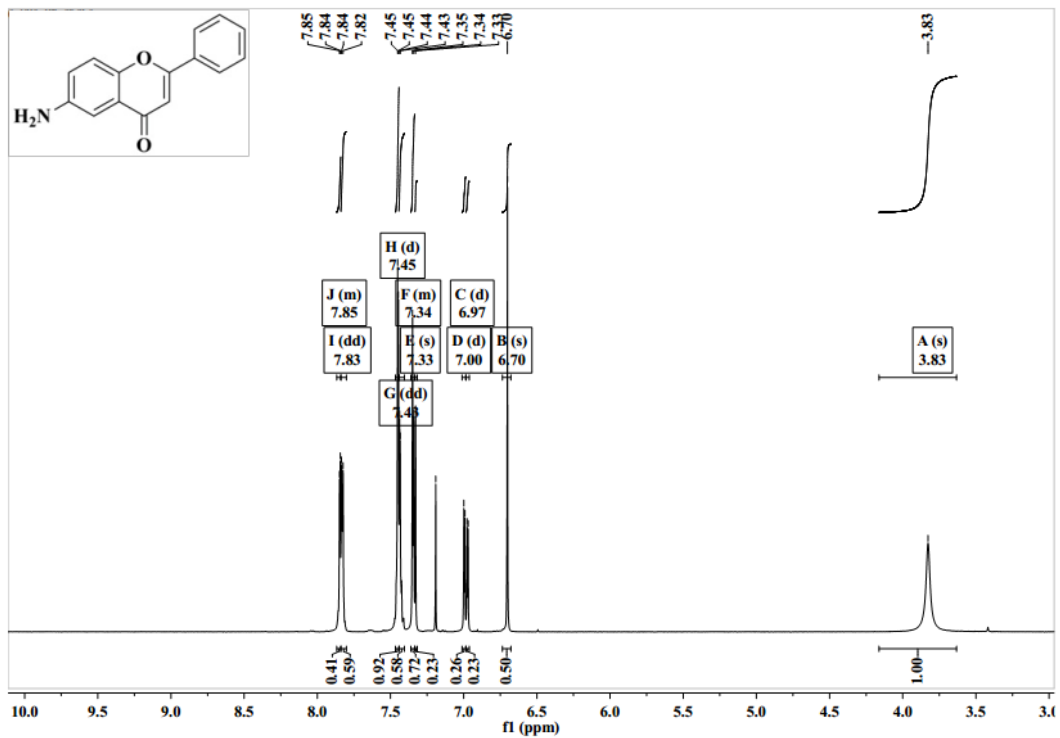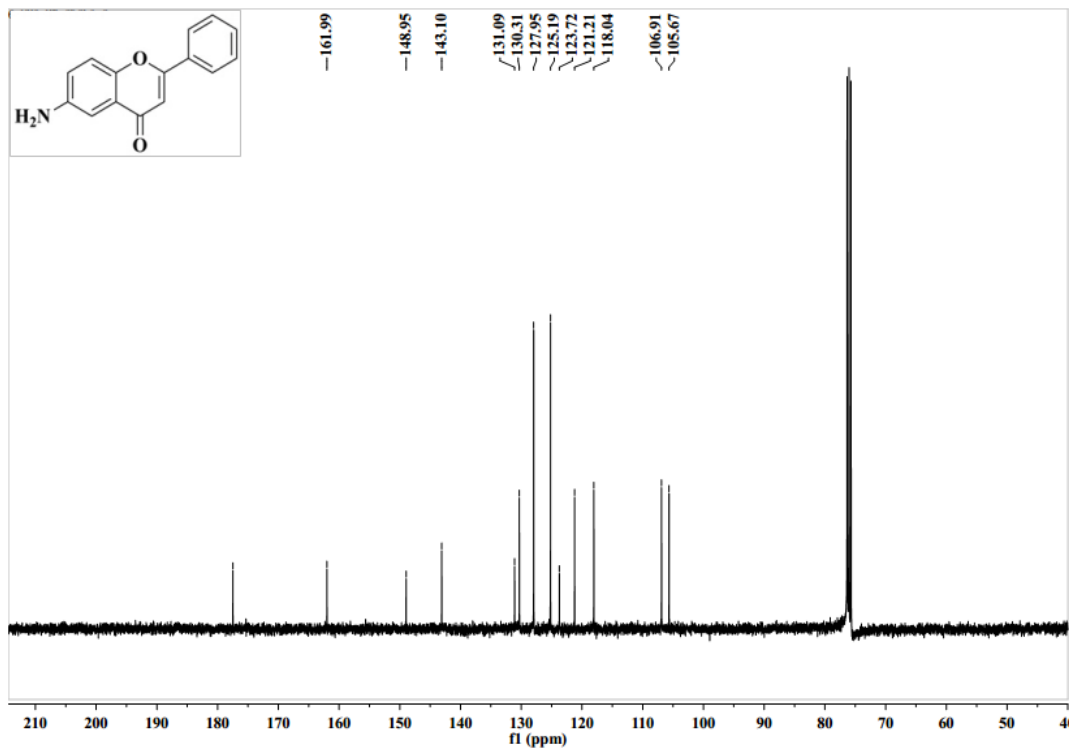

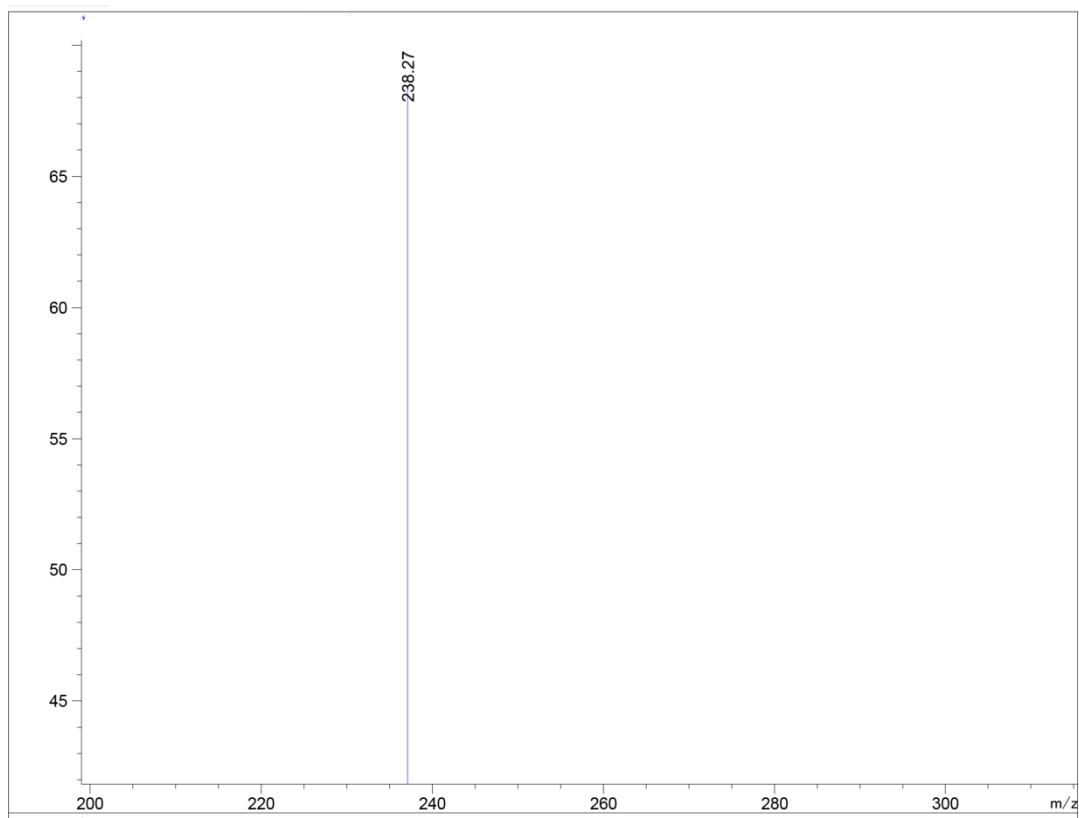

**Figure S12.**  $^1\text{H}$ ,  $^{13}\text{C}$  NMR spectra and ESI-MS analysis for compound **5h**.

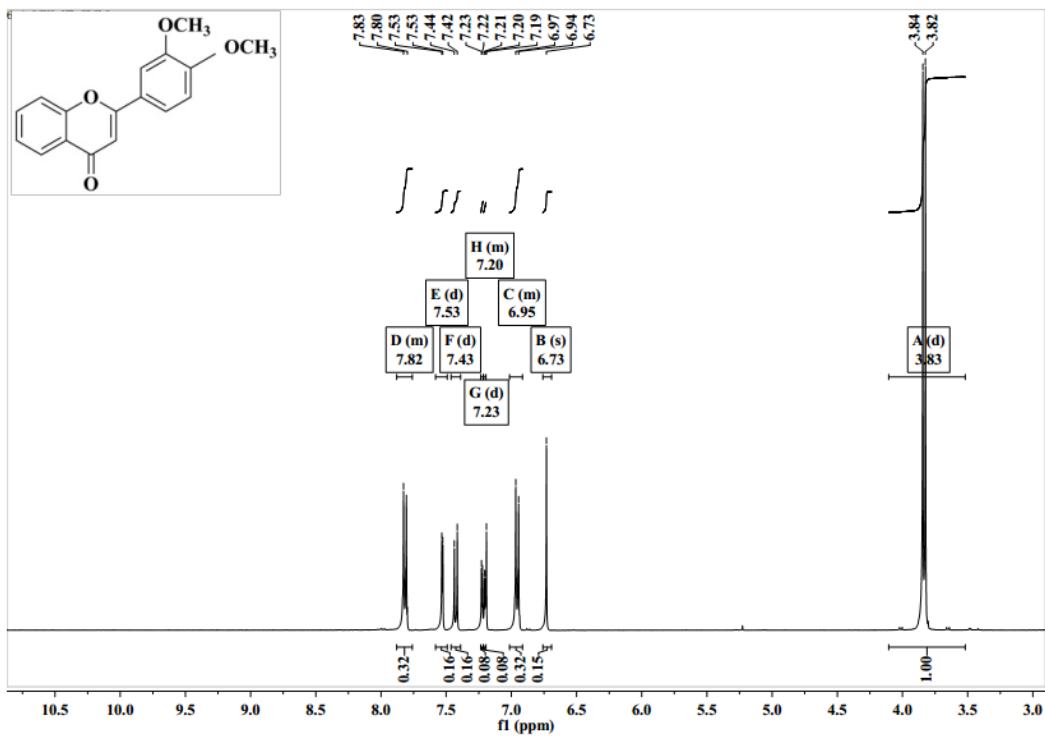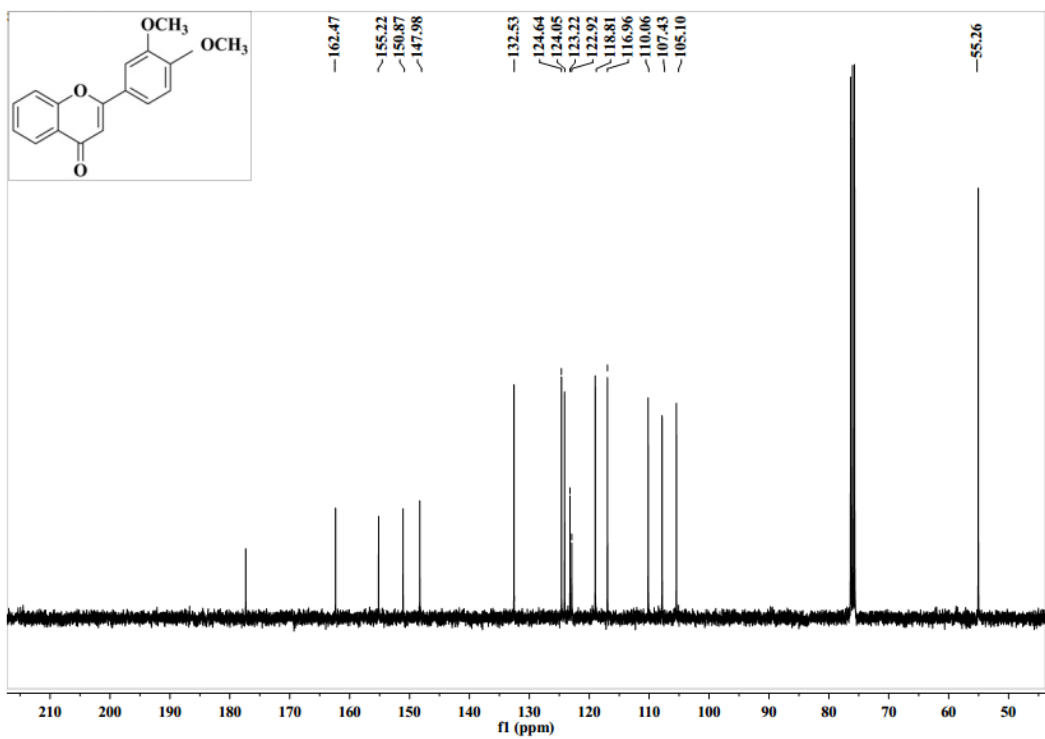

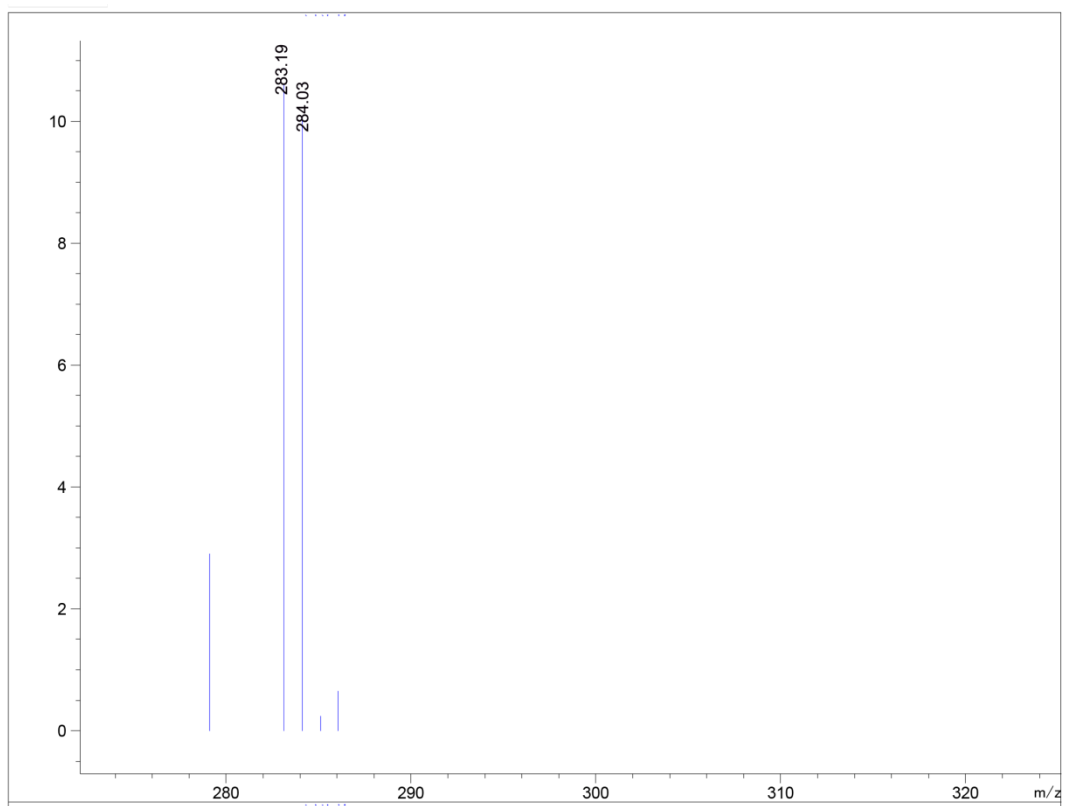

**Figure S13.**  $^1\text{H}$ ,  $^{13}\text{C}$  NMR spectra and ESI-MS analysis for compound **5i**.

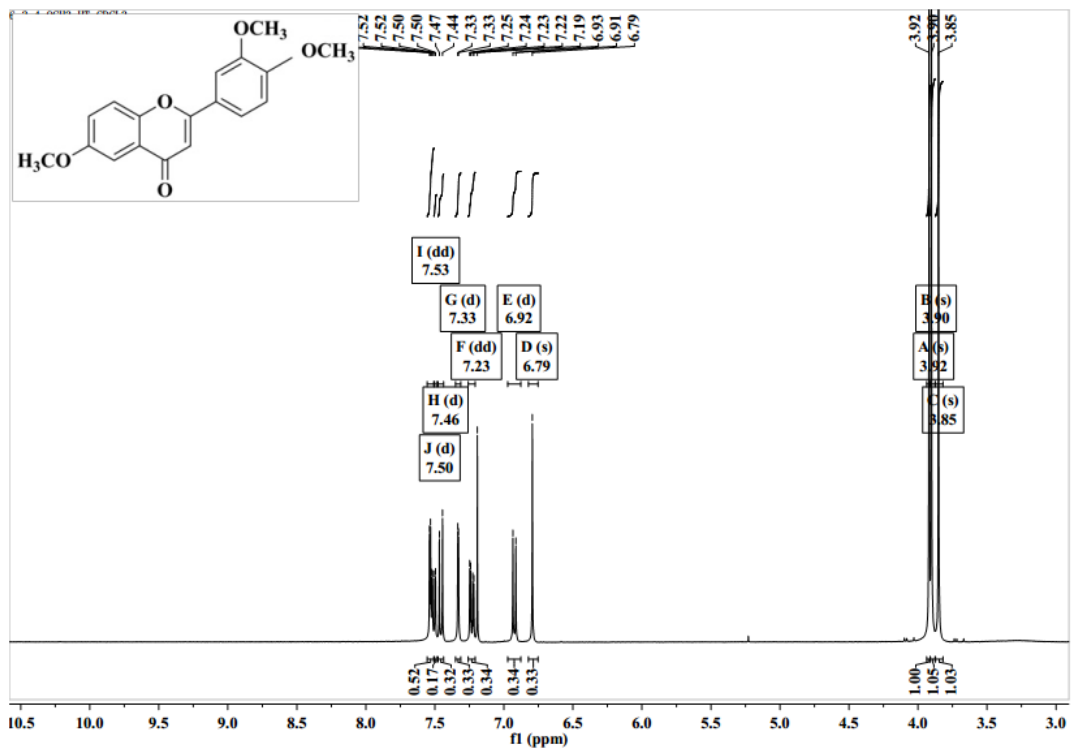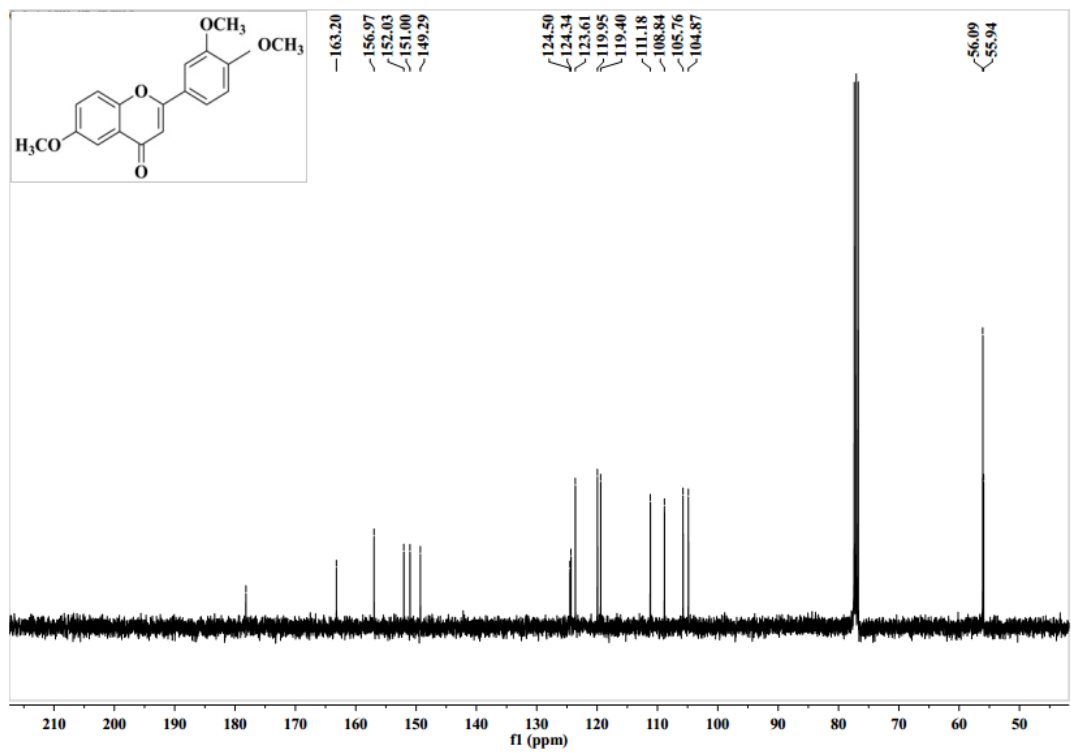



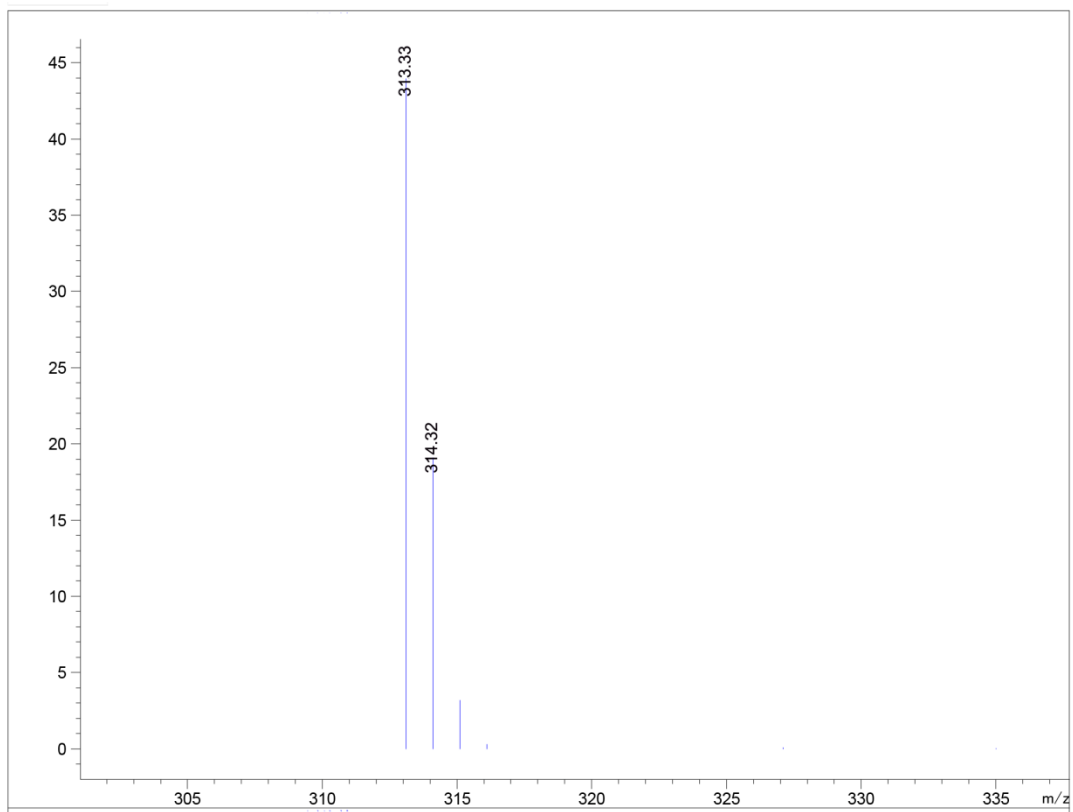

**Figure S14.**  $^1\text{H}$ ,  $^{13}\text{C}$  NMR spectra and ESI-MS analysis for compound **5j**.
